# Supplementary material for: Diffusion-weighted magnetic resonance imaging for the diagnosis of giant cell arteritis – a comparison with T1-weighted black-blood imaging
Source: bioRxiv or medRxiv preprint supplement (doi:10.1101/2023.07.14.23288940), 2023-07-16
Supplement: Supplementary file [file media-1.pdf]

## **Supplementary material**

Supplementary Figures S1 – S4

Supplementary Tables S1 – S7

**Supplementary Figure S1. Patient flow chart**

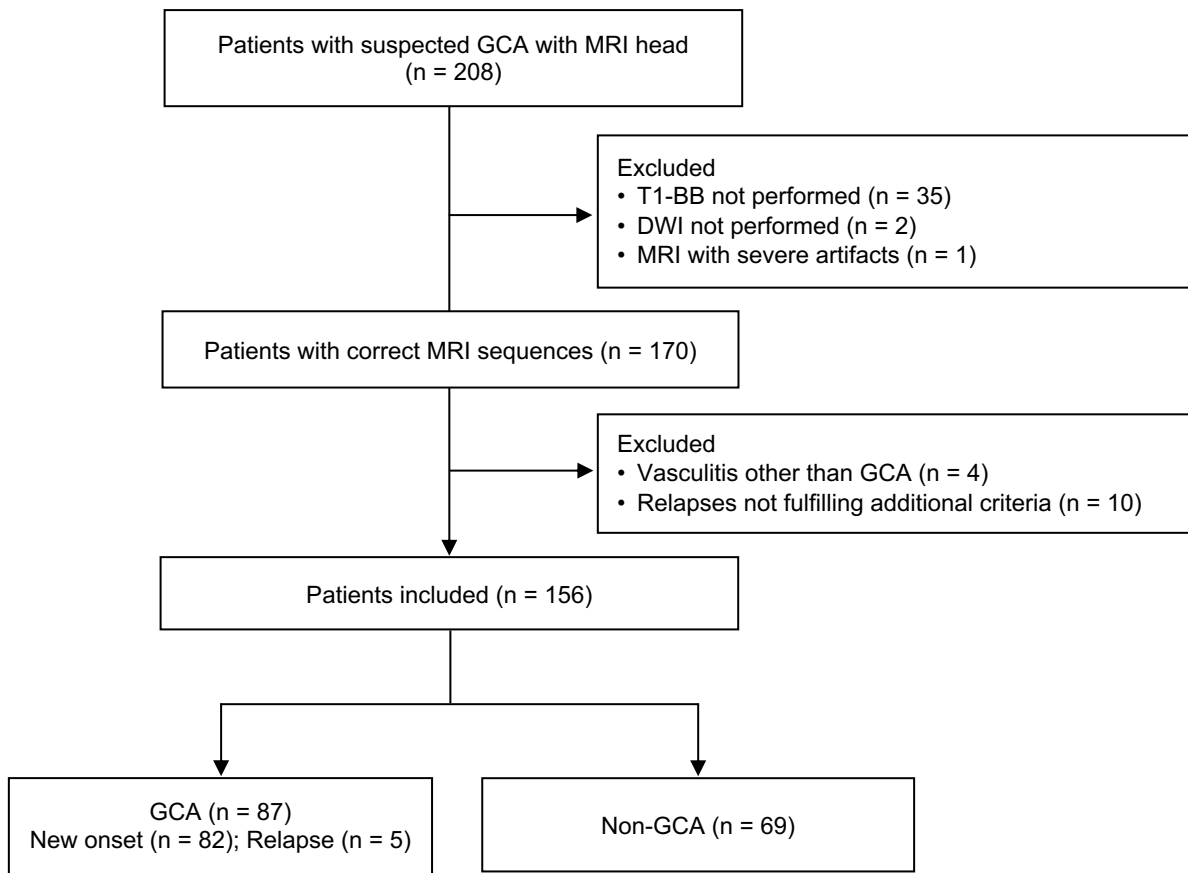

**Figure legend S1:** Vasculitis other than GCA: 1 x ANCA-associated vasculitis, 1x IgG4-related temporal arteritis, 1x drug-induced-vasculitis, 1x transient and self-limited vasculitis of unknown cause.

**Supplementary Table S1. Details of MRI scanners, DWI sequences and parameters**

| Characteristics                             | N = 156<br>(n, %) |
|---------------------------------------------|-------------------|
| <b>MRI scanner</b>                          |                   |
| Siemens Prisma Fit                          | 15 (9.6%)         |
| Siemens Skyra Fit                           | 40 (25.6%)        |
| Siemens Verio                               | 2 (1.3%)          |
| Siemens Vida                                | 99 (63.5%)        |
| <b>Receiving coil</b>                       |                   |
| HeadNeck 20 channels                        | 37 (23.7%)        |
| HeadNeck 64 channels                        | 61 (39.1%)        |
| Unknown                                     | 58 (37.2%)        |
| <b>DWI method</b>                           |                   |
| EPI, readout-segmented multi-shot (RESOLVE) | 154 (98.7%)       |
| EPI, single shot                            | 2 (1.3%)          |
| <b>b-value</b>                              |                   |
| 1000 s/mm <sup>2</sup>                      | 156 (100%)        |
| <b>Slice thickness</b>                      |                   |
| 4 mm                                        | 154 (98.7%)       |
| 5 mm                                        | 2 (1.3%)          |
| <b>Repetition time (TR) (ms)</b>            |                   |
| Median (IQR)                                | 5750 (4570, 5750) |
| Range                                       | 3500, 5750        |
| <b>Echo time (TE) (ms)</b>                  |                   |
| Median (IQR)                                | 61 (61, 67)       |
| Range                                       | 55, 89            |
| <b>Number of excitations / averages</b>     |                   |
| 1                                           | 154 (98.7%)       |
| 4                                           | 2 (1.3%)          |
| <b>Acquisition matrix</b>                   |                   |
| 128 x 128                                   | 2 (1.3%)          |
| 176 x 176                                   | 8 (5.1%)          |
| 192 x 192                                   | 146 (93.6%)       |
| <b>Field of view</b>                        |                   |
| 220 mm x 220 mm                             | 154 (98.7%)       |
| 230 mm x 230 mm                             | 2 (1.3%)          |
| <b>Voxel size</b>                           |                   |
| 1.15 x 1.15 x 4.00 mm                       | 146 (93.6%)       |
| 1.25 x 1.25 x 4.00 mm                       | 8 (5.1%)          |
| 1.80 x 1.80 x 5.00 mm                       | 2 (1.3%)          |
| <b>Flip angle</b>                           |                   |
| 90                                          | 2 (1.3%)          |
| 180                                         | 154 (98.7%)       |
| <b>Slice spacing</b>                        |                   |
| 4.8 mm                                      | 153 (98.1%)       |
| 5.2 mm                                      | 1 (0.6%)          |
| 6.0 mm                                      | 2 (1.3%)          |

**Table legend S1:** EPI, echo-planar imaging; IQR, interquartile range

**Supplementary Figure S2. Brightness setting for assessment of superficial cranial arteries in DWI**

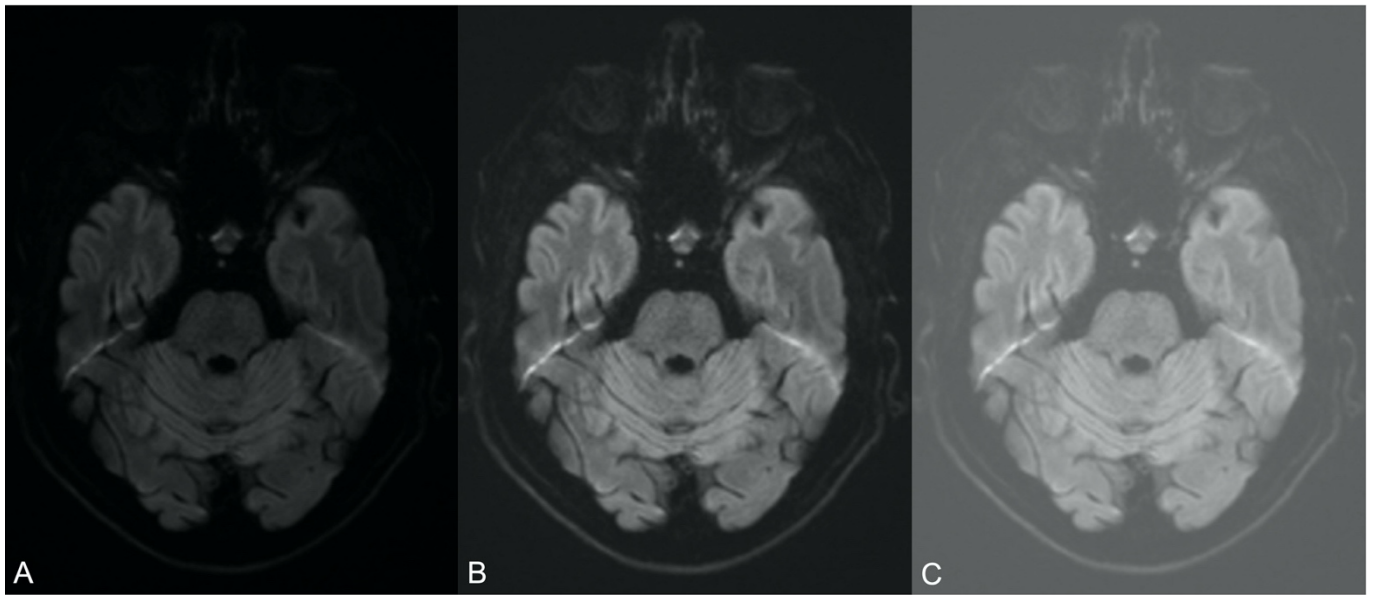

**Figure legend S2:** **A)** The brightness is too low: skin and air are not distinguishable; the subcutaneous fat is black. **B)** Optimal brightness: the skin can be distinguished from the surrounding air; the subcutaneous fat is dark gray and anatomical structures such as facial muscles are readily visible. **C)** Brightness is too high.

**Supplementary Figure S3. T2-fs-scoring for superficial cranial arteries**

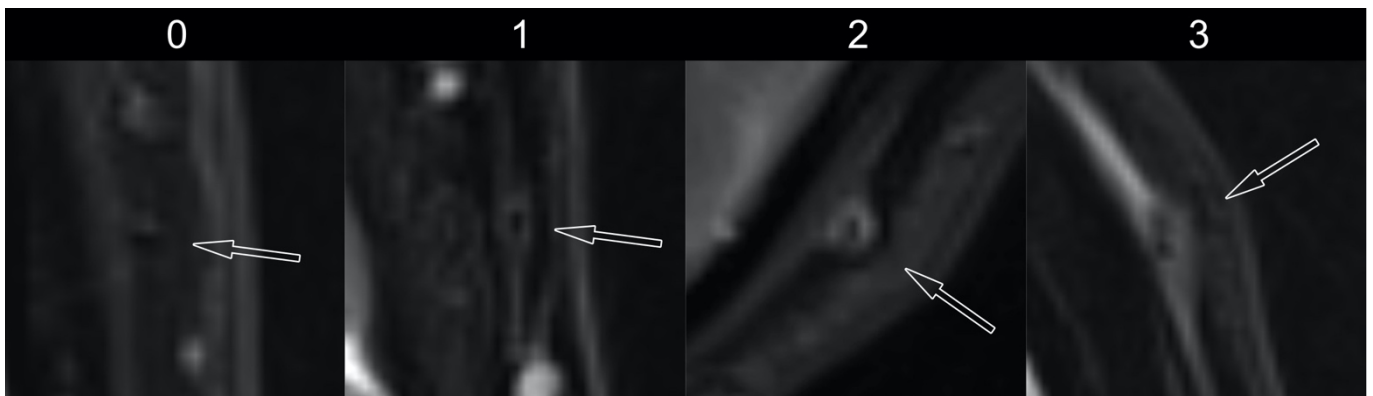

**Figure legend S3:** T2-fs-scoring (0 – 3): 0 = vessel wall not visible; 1= vessel wall visible; 2 = vessel wall prominently visible; 3 = vessel wall prominently visible and perivascular edema.

**Supplementary Figure S4. DWI-scoring for superficial cranial arteries (version without arrows)**

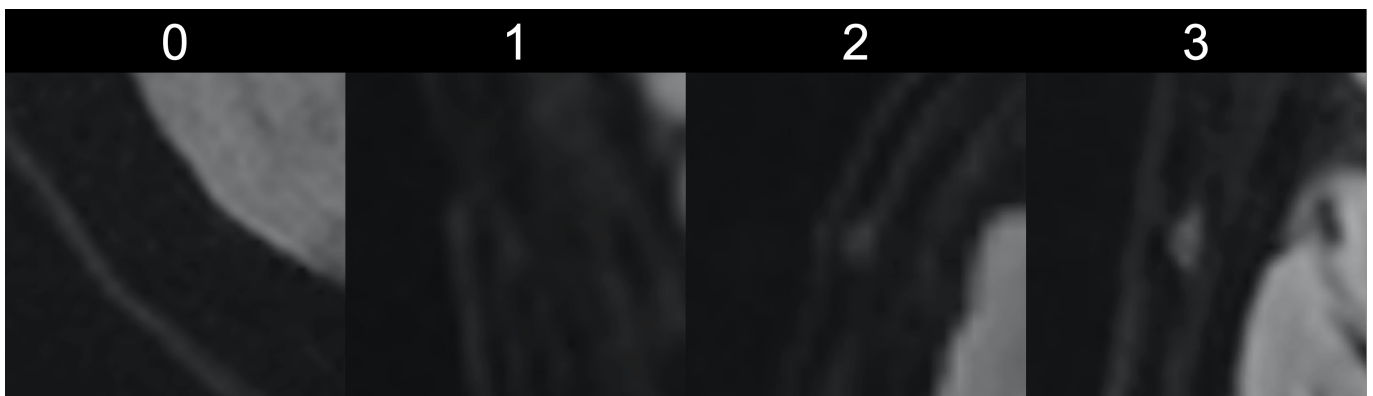

**Figure legend S4:** DWI-scoring (0 – 3): 0 = artery not visible; 1 = artery slightly visible; 2 = artery prominently visible; 3 = artery brightly visible.

**Supplementary Table S2. Clinical diagnosis for patients without giant cell arteritis (total study population)**

| Expert Diagnosis at 6 months                        | n (%) (N = 69) |
|-----------------------------------------------------|----------------|
| Polymyalgia rheumatica                              | 23 (33.3%)     |
| Primary headache                                    | 10 (14.5%)     |
| Non-arteritic anterior ischemic optic neuropathy    | 9 (13.0%)      |
| Polyarthritis                                       | 9 (13.0%)      |
| Retinal artery occlusion                            | 2 (2.9%)       |
| Prominently visible temporal artery (physiological) | 2 (2.9%)       |
| Infection                                           | 2 (2.9%)       |
| Lymphoma                                            | 2 (2.9%)       |
| Sarcoidosis                                         | 2 (2.9%)       |
| Other *                                             | 8 (11.6%)      |

\* One each: atherosclerosis; calcium pyrophosphate deposition disease (CPPD); cryptogenic organizing pneumonia; hypertensive urgency; idiopathic abducens palsy; late-onset spondyloarthritis; stroke; unclear systemic inflammation with spontaneous resolution

**Supplementary Table S3. Correct diagnosis of DWI-1, DWI-2 and T1-BB methods compared to the reference diagnosis**

| Total study population *               |                           |                          |                          |                                |
|----------------------------------------|---------------------------|--------------------------|--------------------------|--------------------------------|
|                                        | Total<br>(N = 156)        | No GCA<br>(N = 69)       | GCA<br>(N = 87)          | Correct diagnosis<br>(N = 156) |
| <b>DWI-1</b>                           |                           |                          |                          | 111 (71.2%, 63.6 - 77.7%)      |
| No Vasculitis                          | 28 (17.9%, 12.7 - 24.7%)  | 26 (37.7%, 27.2 - 49.5%) | 2 (2.3%, 0.6 - 8.0%)     |                                |
| Vasculitis                             | 128 (82.1%, 75.3 - 87.3%) | 43 (62.3%, 50.5 - 72.8%) | 85 (97.7%, 92.0 - 99.4%) |                                |
| <b>DWI-2</b>                           |                           |                          |                          | 131 (84.0%, 77.4 - 88.9%)      |
| No Vasculitis                          | 86 (55.1%, 47.3 - 62.7%)  | 65 (94.2%, 86.0 - 97.7%) | 21 (24.1%, 16.4 - 34.1%) |                                |
| Vasculitis                             | 70 (44.9%, 37.3 - 52.7%)  | 4 (5.8%, 2.3 - 14.0%)    | 66 (75.9%, 65.9 - 83.6%) |                                |
| <b>T1-BB</b>                           |                           |                          |                          | 138 (88.5%, 82.5 - 92.6%)      |
| No Vasculitis                          | 71 (45.5%, 37.9 - 53.3%)  | 61 (88.4%, 78.8 - 94.0%) | 10 (11.5%, 6.4 - 19.9%)  |                                |
| Vasculitis                             | 85 (54.5%, 46.7 - 62.1%)  | 8 (11.6%, 6.0 - 21.2%)   | 77 (88.5%, 80.1 - 93.6%) |                                |
| Patients with cranial manifestations * |                           |                          |                          |                                |
|                                        | Total<br>(N = 128)        | No GCA<br>(N = 53)       | GCA<br>(N = 75)          | Correct diagnosis<br>(N = 128) |
| <b>DWI-1</b>                           |                           |                          |                          | 92 (71.9%, 63.5 - 78.9%)       |
| No Vasculitis                          | 21 (16.4%, 11.0 - 23.8%)  | 19 (35.8%, 24.3 - 49.3%) | 2 (2.7%, 0.7 - 9.2%)     |                                |
| Vasculitis                             | 107 (83.6%, 76.2 - 89.0%) | 34 (64.2%, 50.7 - 75.7%) | 73 (97.3%, 90.8 - 99.3%) |                                |
| <b>DWI-2</b>                           |                           |                          |                          | 111 (86.7%, 79.8 - 91.5%)      |
| No Vasculitis                          | 64 (50.0%, 41.5 - 58.5%)  | 50 (94.3%, 84.6 - 98.1%) | 14 (18.7%, 11.5 - 28.9%) |                                |
| Vasculitis                             | 64 (50.0%, 41.5 - 58.5%)  | 3 (5.7%, 1.9 - 15.4%)    | 61 (81.3%, 71.1 - 88.5%) |                                |
| <b>T1-BB</b>                           |                           |                          |                          | 118 (92.2%, 86.2 - 95.7%)      |
| No Vasculitis                          | 53 (41.4%, 33.2 - 50.1%)  | 48 (90.6%, 79.7 - 95.9%) | 5 (6.7%, 2.9 - 14.7%)    |                                |
| Vasculitis                             | 75 (58.6%, 49.9 - 66.8%)  | 5 (9.4%, 4.1 - 20.3%)    | 70 (93.3%, 85.3 - 97.1%) |                                |

**Table legend S3:** \*, n (%; 95%-Confidence interval); DWI-1, diffusion weighted imaging with  $\geq 1$  slice; DWI-2, diffusion weighted imaging with  $\geq 2$  slices; T1-BB, T1-black-blood.

**Supplementary Table S4. Comparison of DWI-2 with T1-BB on a segment level (total study population)**

|                                             | <i>N</i> * | Total<br><i>n</i> (%) | <i>N</i> * | No GCA<br><i>n</i> (%) | <i>N</i> * | GCA<br><i>n</i> (%) | P-value |
|---------------------------------------------|------------|-----------------------|------------|------------------------|------------|---------------------|---------|
| <b>Common superficial temporal arteries</b> | 254        |                       | 121        |                        | 133        |                     | <0.001  |
| DWI-2 and T1-BB normal                      |            | 173 (68.1%)           |            | 117 (96.7%)            |            | 56 (42.1%)          |         |
| DWI-2 pathological, T1-BB normal            |            | 1 (0.4%)              |            | 0 (0.0%)               |            | 1 (0.8%)            |         |
| DWI-2 normal, T1-BB pathological            |            | 32 (12.6%)            |            | 3 (2.5%)               |            | 29 (21.8%)          |         |
| DWI-2 and T1-BB pathological                |            | 48 (18.9%)            |            | 1 (0.8%)               |            | 47 (35.3%)          |         |
| <b>Temporal arteries, frontal branches</b>  | 309        |                       | 137        |                        | 172        |                     | <0.001  |
| DWI-2 and T1-BB normal                      |            | 173 (56.0%)           |            | 128 (93.4%)            |            | 45 (26.2%)          |         |
| DWI-2 pathological, T1-BB normal            |            | 2 (0.6%)              |            | 2 (1.5%)               |            | 0 (0.0%)            |         |
| DWI-2 normal, T1-BB pathological            |            | 27 (8.7%)             |            | 4 (2.9%)               |            | 23 (13.4%)          |         |
| DWI-2 and T1-BB pathological                |            | 107 (34.6%)           |            | 3 (2.2%)               |            | 104 (60.5%)         |         |
| <b>Temporal arteries, parietal branches</b> | 295        |                       | 134        |                        | 161        |                     | <0.001  |
| DWI-2 and T1-BB normal                      |            | 198 (67.1%)           |            | 131 (97.8%)            |            | 67 (41.6%)          |         |
| DWI-2 pathological, T1-BB normal            |            | 3 (1.0%)              |            | 0 (0.0%)               |            | 3 (1.9%)            |         |
| DWI-2 normal, T1-BB pathological            |            | 27 (9.2%)             |            | 3 (2.2%)               |            | 24 (14.9%)          |         |
| DWI-2 and T1-BB pathological                |            | 67 (22.7%)            |            | 0 (0.0%)               |            | 67 (41.6%)          |         |
| <b>Posterior auricular arteries</b>         | 78         |                       | 41         |                        | 37         |                     | <0.001  |
| DWI-2 and T1-BB normal                      |            | 62 (79.5%)            |            | 40 (97.6%)             |            | 22 (59.5%)          |         |
| DWI-2 pathological, T1-BB normal            |            | 0 (0.0%)              |            | 0 (0.0%)               |            | 0 (0.0%)            |         |
| DWI-2 normal, T1-BB pathological            |            | 12 (15.4%)            |            | 1 (2.4%)               |            | 11 (29.7%)          |         |
| DWI-2 and T1-BB pathological                |            | 4 (5.1%)              |            | 0 (0.0%)               |            | 4 (10.8%)           |         |
| <b>Occipital arteries</b>                   | 308        |                       | 136        |                        | 172        |                     | <0.001  |
| DWI-2 and T1-BB normal                      |            | 199 (64.6%)           |            | 131 (96.3%)            |            | 68 (39.5%)          |         |
| DWI-2 pathological, T1-BB normal            |            | 2 (0.6%)              |            | 0 (0.0%)               |            | 2 (1.2%)            |         |
| DWI-2 normal, T1-BB pathological            |            | 31 (10.1%)            |            | 2 (1.5%)               |            | 29 (16.9%)          |         |
| DWI-2 and T1-BB pathological                |            | 76 (24.7%)            |            | 3 (2.2%)               |            | 73 (42.4%)          |         |
| <b>All segments combined</b>                | 1244       |                       | 569        |                        | 675        |                     | <0.001  |
| DWI-2 and T1-BB normal                      |            | 805 (64.7%)           |            | 547 (96.1%)            |            | 258 (38.2%)         |         |
| DWI-2 pathological, T1-BB normal            |            | 8 (0.6%)              |            | 2 (0.4%)               |            | 6 (0.9%)            |         |
| DWI-2 normal, T1-BB pathological            |            | 129 (10.4%)           |            | 13 (2.3%)              |            | 116 (17.2%)         |         |
| DWI-2 and T1-BB pathological                |            | 302 (24.3%)           |            | 7 (1.2%)               |            | 295 (43.7%)         |         |

**Table legend S4:** \* Number of non-missing observations; DWI-2, diffusion weighted imaging with  $\geq 2$  slices; T1-BB, T1-black-blood.

**Supplementary Table S5. Sensitivity and specificity of DWI-2 with T1-BB as reference (total study population)**

|                              | Pathological DWI-2 /<br>Pathological T1-BB | Sensitivity (95% CI)  | Normal DWI-2 /<br>Normal T1-BB | Specificity (95% CI)   |
|------------------------------|--------------------------------------------|-----------------------|--------------------------------|------------------------|
| Left common superficial TA   | 20/38                                      | 52.6% (37.3 - 67.5%)  | 86/86                          | 100.0% (95.7 - 100.0%) |
| Right common superficial TA  | 28/42                                      | 66.7% (51.6 - 79.0%)  | 87/88                          | 98.9% (93.8 - 99.8%)   |
| Left TA frontal branch       | 49/62                                      | 79.0% (67.4 - 87.3%)  | 90/91                          | 98.9% (94.0 - 99.8%)   |
| Right TA frontal branch      | 58/72                                      | 80.6% (70.0 - 88.0%)  | 83/84                          | 98.8% (93.6 - 99.8%)   |
| Left TA parietal branch      | 33/43                                      | 76.7% (62.3 - 86.8%)  | 100/102                        | 98.0% (93.1 - 99.5%)   |
| Right TA parietal branch     | 34/51                                      | 66.7% (53.0 - 78.0%)  | 98/99                          | 99.0% (94.5 - 99.8%)   |
| Left post. auricular artery  | 1/7                                        | 14.3% (2.6 - 51.3%)   | 29/29                          | 100.0% (88.3 - 100.0%) |
| Right post. auricular artery | 3/9                                        | 33.3% (12.1 - 64.6%)  | 33/33                          | 100.0% (89.6 - 100.0%) |
| Left occipital artery        | 36/50                                      | 72.0% (58.3 - 82.5%)  | 103/103                        | 100.0% (96.4 - 100.0%) |
| Right occipital artery       | 40/57                                      | 70.2% (57.3 to 80.5%) | 96/98                          | 98.0% (92.9 - 99.4%)   |

**Table legend S5:** DWI-2, diffusion weighted imaging with  $\geq 2$  slices; T1-BB, T1-black-blood; TA, temporal artery.

**Supplementary Table S6. Binary agreement between readers for DWI-2 and T1-BB for a subset of 20 patients**

|                                 | <b>Reader 2 – No Vasculitis<br/>(Score 0 or 1)</b><br>n (% , 95% CI) | <b>Reader 2 – Vasculitis<br/>(Score 2 or 3)</b><br>n (% , 95% CI) | <b>Agreement</b><br>n (% , 95% CI) | <b>Cohen's kappa</b><br>(95% CI) |
|---------------------------------|----------------------------------------------------------------------|-------------------------------------------------------------------|------------------------------------|----------------------------------|
| <b>Patient level (Reader 1)</b> |                                                                      |                                                                   |                                    |                                  |
| <b>DWI-2</b>                    |                                                                      |                                                                   | 20 (100%, 83.9 - 100%)             | 1.00 (not estimable)             |
| No Vasculitis                   | 9 (100%, 70.1 - 100%)                                                | 0 (0.0%, 0.0 - 25.9%)                                             |                                    |                                  |
| Vasculitis                      | 0 (0.0%, 0.0 - 29.9%)                                                | 11 (100%, 74.1 - 100%)                                            |                                    |                                  |
| <b>T1-BB</b>                    |                                                                      |                                                                   | 18 (90.0%, 69.9 - 97.2%)           | 0.78 (0.50 - 1.00)               |
| No Vasculitis                   | 6 (75.0%, 40.9 - 92.9%)                                              | 0 (0.0%, 0.0 - 24.2%)                                             |                                    |                                  |
| Vasculitis                      | 2 (25.0%, 7.1 - 59.1%)                                               | 12 (100%, 75.8 - 100%)                                            |                                    |                                  |
| <b>Segment level (Reader 1)</b> |                                                                      |                                                                   |                                    |                                  |
| <b>DWI-2 (all segments)</b>     |                                                                      |                                                                   | 156 (93.4%, 88.6 - 96.3%)          | 0.85 (0.76 - 0.93)               |
| Score 0 or 1                    | 108 (95.6%, 90.1 - 98.1%)                                            | 6 (11.1%, 5.2 - 22.2%)                                            |                                    |                                  |
| Score 2 or 3                    | 5 (4.4%, 1.9 - 9.9%)                                                 | 48 (88.9%, 77.8 - 94.8%)                                          |                                    |                                  |
| <b>T1-BB (all segments)</b>     |                                                                      |                                                                   | 146 (89.6%, 83.9 - 93.4%)          | 0.79 (0.69 - 0.88)               |
| Score 0 or 1                    | 87 (87.9%, 80.0 - 92.9%)                                             | 5 (7.8%, 3.4 - 17.0%)                                             |                                    |                                  |
| Score 2 or 3                    | 12 (12.1%, 7.1 - 20.0%)                                              | 59 (92.2%, 83.0 - 96.6%)                                          |                                    |                                  |

**Table legend S6:** CI, confidence interval; DWI-2, diffusion weighted imaging with  $\geq 2$  slices; T1-BB, T1-black-blood.

**Supplementary Table S7. Correlation of DWI-1 and T2-fs on a segment level**

|                            | <b>T2-fs score</b>   |                       |                       |                       |
|----------------------------|----------------------|-----------------------|-----------------------|-----------------------|
|                            | <b>0</b><br>(N = 77) | <b>1</b><br>(N = 663) | <b>2</b><br>(N = 279) | <b>3</b><br>(N = 220) |
| <b>DWI-1 score - n (%)</b> |                      |                       |                       |                       |
| <b>0</b>                   | 48 (62.3%)           | 64 (9.7%)             | 0 (0.0%)              | 0 (0.0%)              |
| <b>1</b>                   | 27 (35.1%)           | 503 (75.9%)           | 99 (35.5%)            | 4 (1.8%)              |
| <b>2</b>                   | 1 (1.3%)             | 95 (14.3%)            | 160 (57.3%)           | 105 (47.7%)           |
| <b>3</b>                   | 0 (0.0%)             | 1 (0.2%)              | 17 (6.1%)             | 107 (48.6%)           |
| <b>missing</b>             | 1 (1.3%)             | 0 (0.0%)              | 3 (1.1%)              | 4 (1.8%)              |

**Table legend S7:** Based on 1239 segments from 152 patients (T2-fs was missing for 4 patients). Spearman's rho: 0.74 (95%-confidence interval: 0.71 – 0.76). DWI-1, diffusion weighted imaging with  $\geq 1$  slice.
